# Supplementary material for: Lucio Phenomenon: An Unusual Case of Skin Necrosis
Source: PubMed Central journal article supplement — Case Rep Dermatol. 2024 Feb 23;16(1):47–54. doi: 10.1159/000536370 (PMC10890809; doi:10.1159/000536370), 2024-02-23
Supplement: Supplementary_material-Suppl.1-s1.pdf [file Supplementary_material-Suppl.1-s1.pdf]

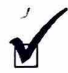

| Topic                       | Item | Checklist item description                                                                                   | Reported on Line |
|-----------------------------|------|--------------------------------------------------------------------------------------------------------------|------------------|
| Title                       | 1    | The diagnosis or intervention of primary focus followed by the words "case report" .....                     | Line 01.         |
| Key Words                   | 2    | 2 to 5 key words that identify diagnoses or interventions in this case report, including "case report" ...   | Line 17-18.      |
| Abstract<br>(no references) | 3a   | Introduction: What is unique about this case and what does it add to the scientific literature? .....        | Line 5-6         |
|                             | 3b   | Main symptoms and/or important clinical findings .....                                                       | Line 7-8.        |
|                             | 3c   | The main diagnoses, therapeutic interventions, and outcomes .....                                            | Line 9-10        |
|                             | 3d   | Conclusion—What is the main "take-away" lesson(s) from this case? .....                                      | Line 10-15       |
| Introduction                | 4    | One or two paragraphs summarizing why this case is unique ( <b>may include references</b> ) .....            | Line 21-38.      |
| Patient Information         | 5a   | De-identified patient specific information. ....                                                             | Line 41-42       |
|                             | 5b   | Primary concerns and symptoms of the patient. ....                                                           | Line 43-49.      |
|                             | 5c   | Medical, family, and psycho-social history including relevant genetic information .....                      | -                |
|                             | 5d   | Relevant past interventions with outcomes .....                                                              | -                |
| Clinical Findings           | 6    | Describe significant physical examination (PE) and important clinical findings. ....                         | Line 50-59.      |
| Timeline                    | 7    | Historical and current information from this episode of care organized as a timeline .....                   | -                |
| Diagnostic<br>Assessment    | 8a   | Diagnostic testing (such as PE, laboratory testing, imaging, surveys). ....                                  | Line 62-80       |
|                             | 8b   | Diagnostic challenges (such as access to testing, financial, or cultural) .....                              | -                |
|                             | 8c   | Diagnosis (including other diagnoses considered) .....                                                       | Line 81-82       |
|                             | 8d   | Prognosis (such as staging in oncology) where applicable .....                                               | -                |
| Therapeutic<br>Intervention | 9a   | Types of therapeutic intervention (such as pharmacologic, surgical, preventive, self-care) .....             | Line 82-87.      |
|                             | 9b   | Administration of therapeutic intervention (such as dosage, strength, duration) .....                        | -                |
|                             | 9c   | Changes in therapeutic intervention (with rationale) .....                                                   | -                |
| Follow-up and<br>Outcomes   | 10a  | Clinician and patient-assessed outcomes (if available) .....                                                 | -                |
|                             | 10b  | Important follow-up diagnostic and other test results .....                                                  | -                |
|                             | 10c  | Intervention adherence and tolerability (How was this assessed?) .....                                       | -                |
|                             | 10d  | Adverse and unanticipated events .....                                                                       | -                |
| Discussion                  | 11a  | A scientific discussion of the strengths AND limitations associated with this case report .....              | Line 90-158.     |
|                             | 11b  | Discussion of the relevant medical literature <b>with references</b> . ....                                  | Line 118-148     |
|                             | 11c  | The scientific rationale for any conclusions (including assessment of possible causes) .....                 | Line 161-174.    |
|                             | 11d  | The primary "take-away" lessons of this case report (without references) in a one paragraph conclusion ..... | -                |
| Patient Perspective         | 12   | The patient should share their perspective in one to two paragraphs on the treatment(s) they received. ....  | -                |
